# Supplementary material for: Erythrocyte-like liposomes prepared by means of amphiphilic cyclodextrin sulfatesElectronic supplementary information available: experimental details and selected analytical and spectroscopic data for compounds 5aâ€“c. See http://www.rsc.org/suppdata/cc/b1/b110673b/
Source: Royal Society of Chemistry journal article supplement (doi:10.1039/b110673b), 2002-02-01
Supplement: b110673b.doc [file b110673b.doc]

## Supplementary data

Selected data for **5a**: 1H NMR (600 MHz, CDCl3)  5.20 (br, 6H, H-3), 5.09 (br, 6H, H-1), 4.79 (br, 6H, H-2), 4.38-4.02 (br, 24H, H-4, H-5, H-6a, H-6b). 13C NMR (150 MHz, CDCl3)  173.6, 173.0 (C=O), 98.2 (C-1), 72.0-70.2 (C-2, C-3, C-5), 66.5 (C-6), 46.0, 36.1, 34.6, 32.4, 30.3-29.8, 25.2, 23.1 (CH2), 14.5 (CH3). Elemental analysis: calcd for C246H474N6O60S6 **.** 9H2O: C, 61.16; H, 10.27; N, 1.74; S, 3.98; found: C, 61.14; H, 10.15; N, 1.59; S, 3.91. Phase transition temperature (DSC): 44.2 ºC.

Selected data for **5b**: 1H NMR (600 MHz, CDCl3)  5.22 (br, 6H, H-3), 5.15 (br, 6H, H-1), 4.67 (br, 6H, H-2), 4.34-3.87 (br, 24H, H-4, H-5, H-6a, H-6b). 13C NMR (150 MHz, CDCl3)  172.8 (C=O), 96.3 (C-1), 75.0-70.0 (C-2, C-3, C-5), 66.3 (C-6), 45.6, 34.6, 34.2, 34.0, 32.0, 29.9-29.4, 27.1, 24.7, 22.7 (CH2), 14.1 (CH3). Elemental analysis: calcd for C287H553N7O70S7 **.** 4H2O: C, 62.46; H, 10.25; N, 1.78; S, 4.07; found: C, 62.77; H, 10.10; N, 1.67; S, 4.04. Phase transition temperature (DSC): 42.4 ºC.

Selected data for **5c**: 1H NMR (600 MHz, CDCl3)  5.27 (br, 6H, H-3), 5.17 (br, 6H, H-1), 4.61 (br, 6H, H-2), 4.30-3.80 (br, 24H, H-4, H-5, H-6a, H-6b). 13C NMR (150 MHz, CDCl3)  173.2 (C=O), 96.5 (C-1), 68.0-73.0 (C-2, C-3, C-5), 66.4 (C-6), 45.9, 34.6, 32.3, 30.2-29.8, 25.1, 23.0 (CH2), 14.4 (CH3). Elemental analysis: calcd for C328H632N8O80S8 **.** 4H2O: C, 62.56; H, 10.23; N, 1.78; S, 4.07; found: C, 62.83; H, 10.16; N, 1.75; S, 4.03. Phase transition temperature (DSC): 41.8 ºC.

**Procedure for the preparation of liposomes by reverse-phase evaporation**. Liposomes were prepared basically according to the method reported by F. Szoka Jr et al in *Pro. Natl. Acad. Sci*., **75**, 4194 (1978). General condition of the preparation for liposomes is as follows: Cyclodextrin amphiphiles or/and DPPC-cholesterol in diethyl ether were added to 25ml round-bottom flask and the solvent was removed under reduced pressure by a rotary evaporator. The mixture of amphiphiles were redissolved in diethyl ether, in which the reverse phase vesicles will be formed. The pure water or solution containing calcein as aqueous phase was added into the solution at this point (ether: water = 3: 1, v/v). The system is kept under nitrogen, and the resulting two-phase system is sonicated briefly (5 min) in a bath-type sonicator (NEY 28H, USA: 120 W, 45 kHz) until the mixture becomes a homogeneous opalescent dispersion. Liposomes prepared only from cyclodextrin amphiphile were purified by column chromatography on Sephadex G-50 (1.5 × 30 cm) eluted with pure water. On the other hand, liposomes encapsulating calcein were separated from free calcein by using column chromatography on Sephadex G-50 (1.5 × 30 cm) eluted with PBS, pH 7.4.

**Procedure for the determination of the trapped volume.** Measurements of the amount of calcein trapped in liposomes were carried out by using 5.0 l of liposomal suspensions diluted to 2.0 ml with phosphate buffer saline according to the method reported by N. Oku et al. in *Biochim. Biophys. Acta*, **691**, 332 (1982). The fluorescence intensities of the suspension were measured before (**Ftot**) and after (**Fin**) addition of 20 l of CoCl2 (10 mM). **Fin** is the fluorescence from the internal compartment plus the unquenched fraction of the external compartment. Subsequently, 20l of 20% Triton X-100 solution was added and the fluorescence measured again. The latter addition destroys the integrity of the liposomes and the resultant fluorescence intensity (**Ftotq**) represents the equilibrium concentration of free calcein. Thus, the extent of quenching is obtained directly from the sample itself as **Ftotq**/**Ftot**. The trapped volume is calculated from:

[**Fin** – (**Ftotq** · r)] / [**Ftot** – (**Ftotq** · r)] x 100 = Trapped volume (%)

“r” is the dilution factor due to the CoCl2 solution and the Triton X-100 solution in the present case, 1.02.

From these analyses, the diameters of the liposomes in the presence of novel cyclodextrin-based amphiphiles were estimated to be in the range from 100 nm to 350 nm.

**Release profiles of calcein encapsulated into liposomes prepared by means of cyclodextrin-based amphiphiles**.


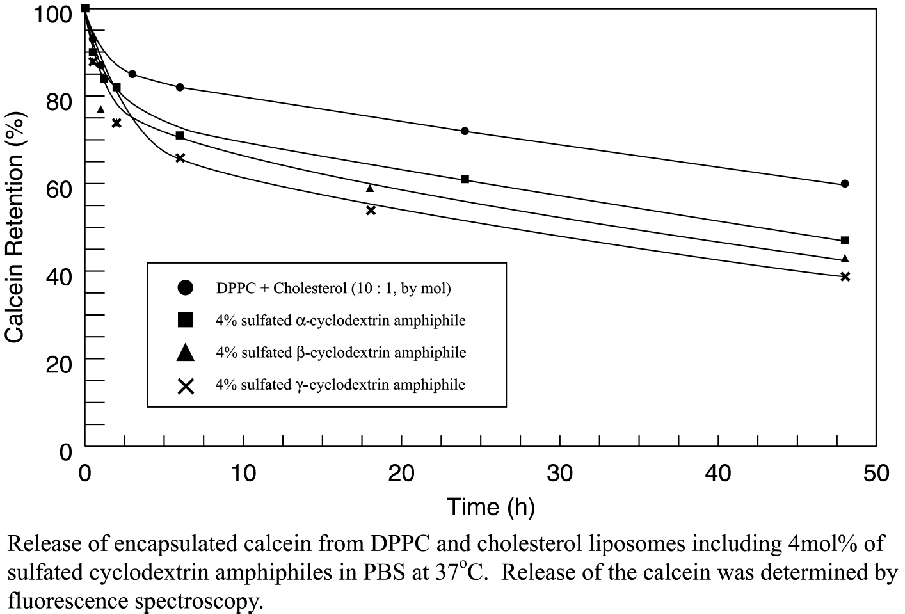


All experimental conditions for the preparation and characterization of these liposomes will be reported in the following full paper as soon as possible.
